CORRECTION

# Correction: Social Complexification and Pig (*Sus scrofa*) Husbandry in Ancient China: A Combined Geometric Morphometric and Isotopic Approach

The PLOS ONE Staff

There is a shading error in the three molar shape reconstructions in Fig 3. Please view [Fig 3](#) here. The publisher apologizes for the error.

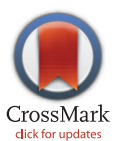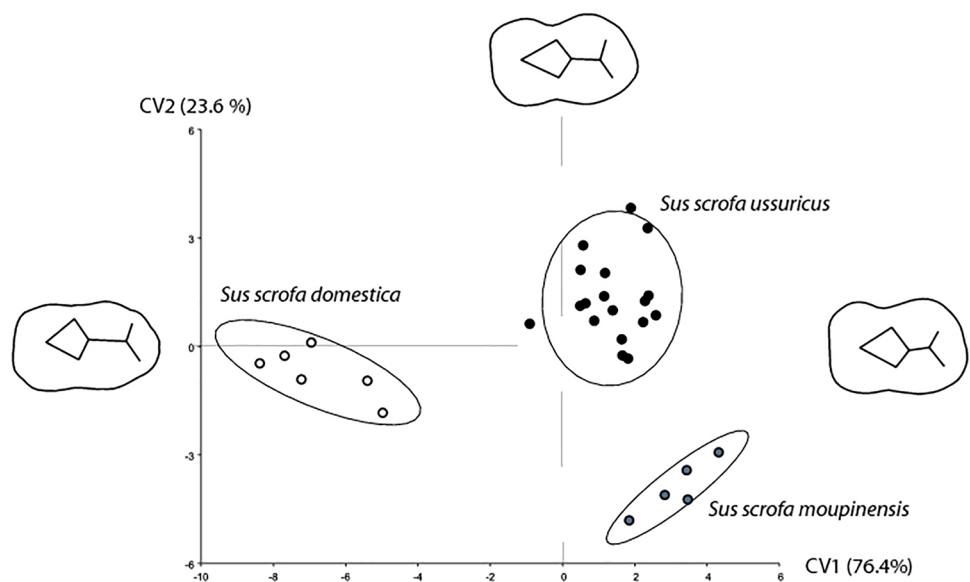

**Fig 3. Molar shape differences between the two extent wild boar sub-species and the domestic pigs of China.** First canonical variates (CV) computed on size corrected shape variables. The molar shape divergence between the wild and domestic type along the CV1 is displayed by shape reconstruction on each axes extremity; the divergence between the two wild boar sub-species is displayed along the CV2. Confidence ellipses contain 90% of the data points with a 0.9 probability.

doi:10.1371/journal.pone.0162134.g001

**OPEN ACCESS**

**Citation:** The PLOS ONE Staff (2016) Correction: Social Complexification and Pig (*Sus scrofa*) Husbandry in Ancient China: A Combined Geometric Morphometric and Isotopic Approach. PLoS ONE 11(8): e0162134. doi:10.1371/journal.pone.0162134

**Published:** August 25, 2016

**Copyright:** © 2016 The PLOS ONE Staff. This is an open access article distributed under the terms of the [Creative Commons Attribution License](#), which permits unrestricted use, distribution, and reproduction in any medium, provided the original author and source are credited.

**Reference**

1. Cucchi T, Dai L, Balasse M, Zhao C, Gao J, Hu Y, et al. (2016) Social Complexification and Pig (*Sus scrofa*) Husbandry in Ancient China: A Combined Geometric Morphometric and Isotopic Approach. PLoS ONE 11(7): e0158523. doi: [10.1371/journal.pone.0158523](https://doi.org/10.1371/journal.pone.0158523) PMID: [27384523](https://pubmed.ncbi.nlm.nih.gov/27384523/)
